# Supplementary material for: Memory effect and coexistence of negative and positive photoconductivity in black phosphorus field effect transistor for neuromorphic vision sensors
Source: Royal Society of Chemistry journal article supplement (doi:10.1039/d4mh00027g), 2024-01-01
Supplement: d4mh00027g1.pdf [file d4mh00027g1.pdf]

## Supplementary Information

### **Memory Effect and Coexistence of Negative and Positive Photoconductivity in Black Phosphorus Field Effect Transistor for Neuromorphic Vision Sensors**

Arun Kumar<sup>1, \*</sup>, Kimberly Intonti<sup>1,2</sup>, Loredana Viscardi<sup>1,2</sup>, Ofelia Durante<sup>1,2</sup>, Aniello Pelella<sup>3</sup>,  
Osamah Kharsah<sup>4</sup>, Stephan Slezione<sup>4</sup>, Filippo Giubileo<sup>2</sup>, Nadia Martucciello<sup>2</sup>, Paolo Ciambelli<sup>5</sup>,  
Marika Schleberger<sup>4</sup>, and Antonio Di Bartolomeo<sup>1,2,\*</sup>

<sup>1</sup>Department of Physics ‘E.R. Caianiello’, University of Salerno, Via Giovanni Paolo II 132, Fisciano 84084, Italy

<sup>2</sup>CNR-SPIN Salerno, Via Giovanni Paolo II 132, Fisciano 84084, Italy

<sup>3</sup>Department of Science and Technology, University of Sannio, Via de Sanctis, Benevento 82100, Italy

<sup>4</sup>Fakultät für Physik and CENIDE, Universität Duisburg-Essen, Lotharstrasse 1, Duisburg D-47057, Germany

<sup>5</sup>Narrando Srl, Via Arcangelo Rotunno 43, Salerno 84134, Italy

\*Corresponding Authors: [akumar@unisa.it](mailto:akumar@unisa.it), [adibartolomeo@unisa.it](mailto:adibartolomeo@unisa.it)

Figure S1 (a) depicts the transistor current throughout a sequence of pulses applied to the gate ( $V_{gs} = \pm 20$  V) at pressure of 2 mbar. Similarly, Figure S1 (b) shows the transistor current after  $V_{gs} = \pm 20$  V pulses, at the lower pressure of  $10^{-5}$  mbar. The transient memory response of the device is compared across various temperatures, at fixed  $V_{ds} = 100$  mV and at the pressures of 2 mbar and  $10^{-5}$  mbar, respectively.

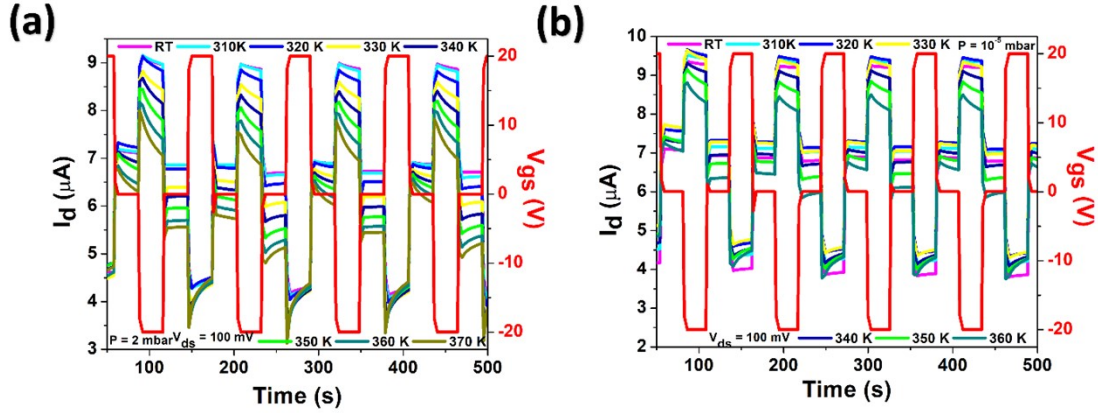

Figure S1. (a) SET/RESET/READ cycles at different temperatures and under 2 mbar pressure; (b) SET/RESET/READ cycles at different temperatures and under  $10^{-5}$  mbar pressure.

In Figure S2 it is shown the slow decay of the transistor current after illumination (persistence). The current returns to the pristine dark level in a time exceeding 8000 s.

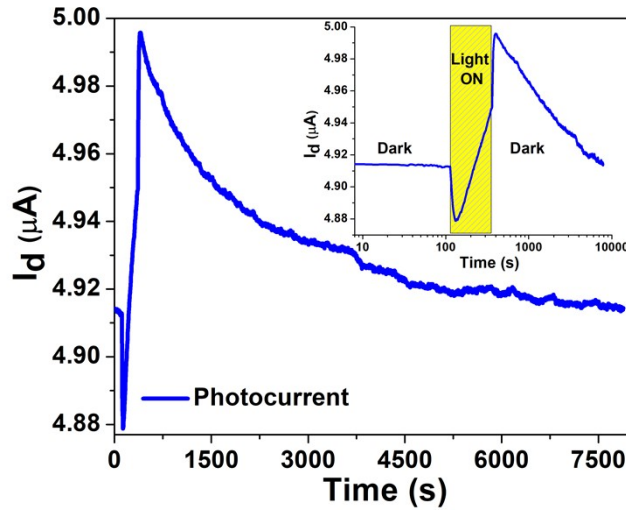

Figure S2. Transient photocurrent measurement with a decay recorded up to 8000 s. The inset shows the same plot with the time on logarithmic scale.
